# Supplementary material for: Emodin Inhibits EBV Reactivation and Represses NPC Tumorigenesis
Source: MDPI journal article supplement (doi:10.3390/cancers11111795), 2019-11-15
Supplement: s1 [file s1]

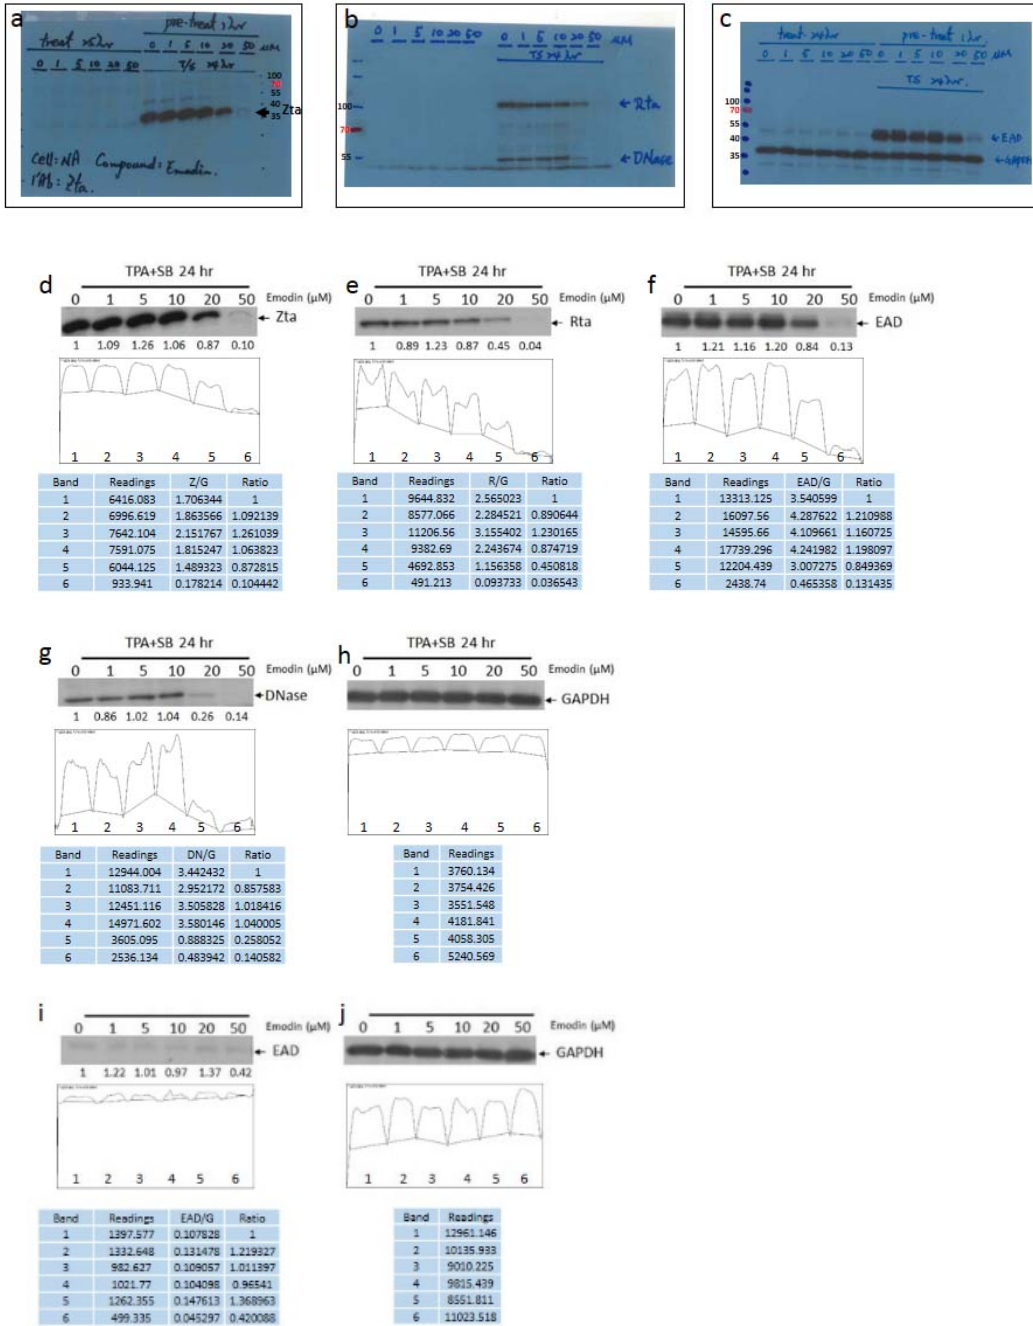

Supplementary Figure 1. The original western results and band densitometry by Image J of Figure 2a.

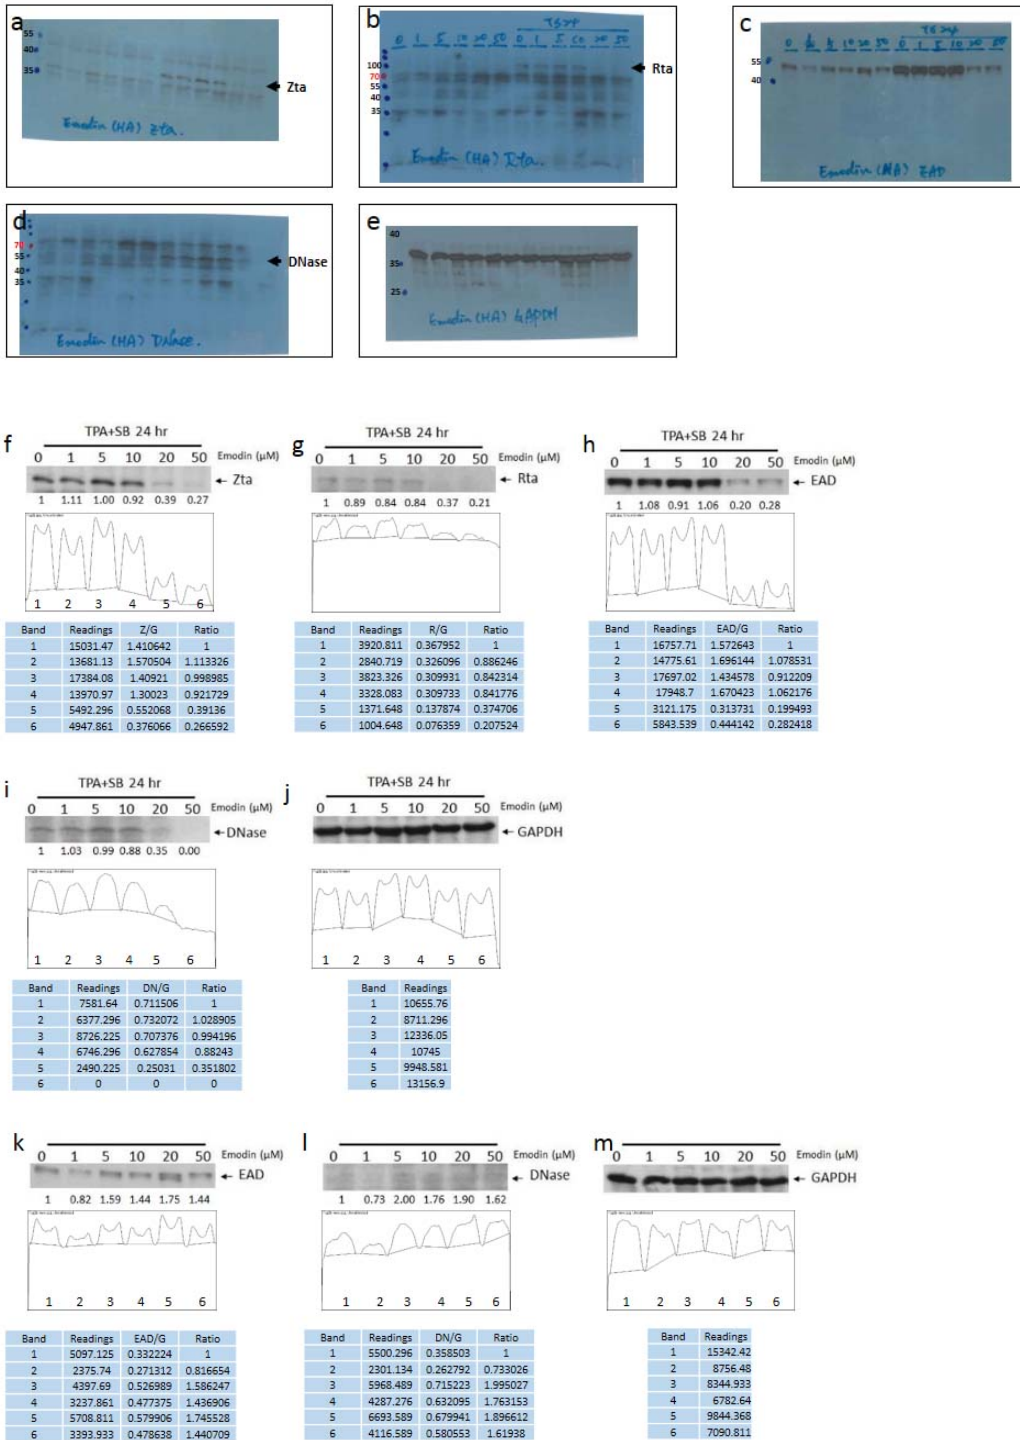

Supplementary Figure 2. The original western results and band densitometry by Image J of Figure 2b.

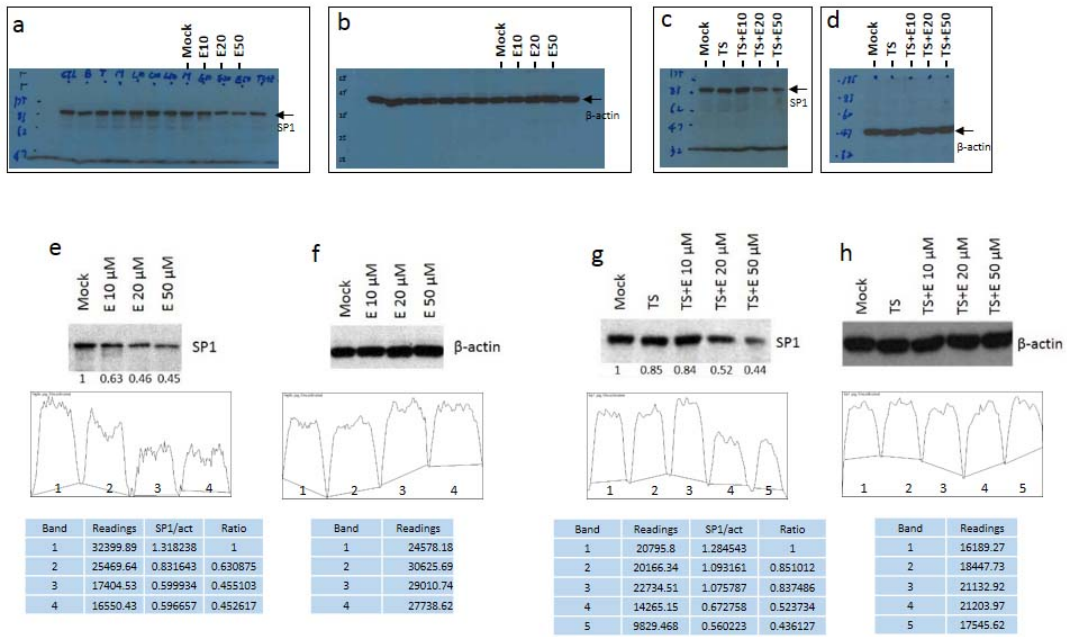

Supplementary Figure 3. The original western results and band densitometry by Image J of Figure 6c.
